# Supplementary material
Source: PubMed Central journal article supplement (PMC10715468)

**Supplementary table 1. STI status by tenofovir diphosphate concentrations at week 26 and week 52 among PrEP acceptors**

|                | Overall         | Low TFV-DP concentration (<700 fmol/punch) | High TFV-DP concentration (>=700fmol/punch) |
|----------------|-----------------|--------------------------------------------|---------------------------------------------|
| <b>Week 26</b> |                 |                                            |                                             |
| CT/GC positive | 142/363 (39.1%) | 123/287 (42.9%)                            | 19/76 (25.0%)                               |
| CT positive    | 114/363 (31.4%) | 102/287 (35.5%)                            | 12/76 (15.8%)                               |
| GC positive    | 44/363 (12.1%)  | 35/287 (12.2%)                             | 9/76 (11.8%)                                |
|                |                 |                                            |                                             |
| <b>Week 52</b> |                 |                                            |                                             |
| CT/GC positive | 142/347 (40.9%) | 123/317 (38.8%)                            | 19/30 (63.3%)                               |
| CT positive    | 114/347 (32.9%) | 102/317 (32.2%)                            | 12/30 (40.0%)                               |
| GC positive    | 44/347 (12.7%)  | 35/317 (11.0%)                             | 9/30 (30.0%)                                |

CT: *C. trachomatis*; GC: *N. gonorrhoeae*; TVF-DP: tenofovir diphosphate

Supplementary table 2. Baseline characteristics, by site

|                                                       | <b>Overall<br/>(N=451)</b> | <b>Cape Town<br/>(n=141)</b> | <b>Johannesburg<br/>(N=162)</b> | <b>Harare<br/>(N=148)</b> | <b>p-values</b>   |
|-------------------------------------------------------|----------------------------|------------------------------|---------------------------------|---------------------------|-------------------|
| <b>Age</b>                                            |                            |                              |                                 |                           | <b>&lt;0.0001</b> |
| Median (IQR)                                          | 21 (19, 22)                | 19 (18, 21)                  | 22 (20, 24)                     | 21 (20, 23)               |                   |
| <b>Highest Level of Education</b>                     |                            |                              |                                 |                           | <b>&lt;0.0001</b> |
| Primary school or less                                | 9(2%)                      | 1 (0%)                       | 1 (0%)                          | 7 (5%)                    |                   |
| Secondary school, not complete                        | 160 (35%)                  | 80 (57%)                     | 27 (17%)                        | 53 (36%)                  |                   |
| Secondary school, complete                            | 228 (51%)                  | 46 (33%)                     | 96 (59%)                        | 86 (58%)                  |                   |
| Post-secondary school                                 | 54 (12%)                   | 14 (10%)                     | 38 (23%)                        | 2 (1%)                    |                   |
| <b>Ever Dropped out of School</b>                     | 128 (28%)                  | 45 (32%)                     | 24 (15%)                        | 59 (40%)                  | <b>&lt;0.0001</b> |
| <b>Regular place to stay</b>                          | 404 (90%)                  | 129 (92%)                    | 140 (87%)                       | 135 (91%)                 | <b>0.038</b>      |
| <b>Live with</b>                                      |                            |                              |                                 |                           | <b>&lt;0.0001</b> |
| Living with parents or siblings                       | 258 (57%)                  | 129 (91%)                    | 78 (48%)                        | 51 (34%)                  |                   |
| Living with partner                                   | 98 (22%)                   | 7 (5%)                       | 24 (15%)                        | 67 (45%)                  |                   |
| Living with someone else                              | 95 (21%)                   | 5 (4%)                       | 60 (37%)                        | 30 (20%)                  |                   |
| <b>Partner age difference (n=349)</b>                 |                            |                              |                                 |                           | <b>&lt;0.0001</b> |
| Less than 5 years                                     | 200 (57%)                  | 44 (37%)                     | 81 (64%)                        | 75 (73%)                  |                   |
| >=5 and <10 years                                     | 115 (33%)                  | 52 (43%)                     | 37 (29%)                        | 26 (25%)                  |                   |
| >=10 years                                            | 34 (10%)                   | 24 (20%)                     | 8 (6%)                          | 2 (2%)                    |                   |
| <b>Partner has other partners, past 3 mo. (n=379)</b> |                            |                              |                                 |                           | <b>&lt;0.0001</b> |
| No                                                    | 76 (20%)                   | 26 (23%)                     | 40 (28%)                        | 10 (8%)                   |                   |
| Yes                                                   | 121 (32%)                  | 26 (23%)                     | 37 (26%)                        | 58 (47%)                  |                   |
| Don't know or prefer not to answer                    | 182 (48%)                  | 62 (55%)                     | 64 (45%)                        | 56 (46%)                  |                   |

|                                                                          | <b>Overall<br/>(N=451)</b> | <b>Cape Town<br/>(n=141)</b> | <b>Johannesburg<br/>(N=162)</b> | <b>Harare<br/>(N=148)</b> | <b>p-values</b>   |
|--------------------------------------------------------------------------|----------------------------|------------------------------|---------------------------------|---------------------------|-------------------|
| <b>Partner has made you feel afraid, unsafe or in danger – past year</b> | 90/449 (20%)               | 23/140 (16%)                 | 18/161 (11%)                    | 49/148 (33%)              | <b>&lt;0.0001</b> |
| <b>Ever pregnant (n=449)</b>                                             | 238 (53%)                  | 46 (33%)                     | 76 (47%)                        | 116 (78%)                 | <b>&lt;0.0001</b> |
| <b>Contraceptive method at baseline</b>                                  |                            |                              |                                 |                           | <b>&lt;0.0001</b> |
| Injectable Contraceptives                                                | 191 (42%)                  | 88 (62%)                     | 76 (47%)                        | 27 (18%)                  |                   |
| Implants                                                                 | 104 (23%)                  | 25 (18%)                     | 11 (7%)                         | 68 (46%)                  |                   |
| IUD or Sterilization                                                     | 5 (1%)                     | 2 (1%)                       | 1 (1%)                          | 2 (0%)                    |                   |
| Oral Contraceptives                                                      | 54 (12%)                   | 9 (6%)                       | 11 (7%)                         | 34 (23%)                  |                   |
| Condoms, natural methods or none                                         | 79 (22%)                   | 17 (12%)                     | 63 (38%)                        | 17 (11%)                  |                   |
| <b>Transactional sex Past month</b>                                      | 101/451 (22%)              | 30/141 (21%)                 | 17/162 (10%)                    | 54/148 (36%)              | <b>&lt;0.0001</b> |
| <b>No. vaginal sex episodes, past mo. (n=359)</b>                        |                            |                              |                                 |                           | <b>&lt;0.0001</b> |
| Median (IQR)                                                             | 4 (2, 8)                   | 4 (3, 5)                     | 3 (2, 7)                        | 6 (3, 17)                 |                   |
| <b>Condom use at last sex (n=352)</b>                                    | 140 (40%)                  | 46 (42%)                     | 50 (38%)                        | 46 (42%)                  |                   |
| <b>Drug use before/during sex, past mo. (n=449)</b>                      | 23 (5%)                    | 2 (1%)                       | 7 (4%)                          | 14 (9%)                   | <b>0.0079</b>     |
| <b>Anal Sex Past month</b>                                               |                            |                              |                                 |                           | <b>0.0507</b>     |
| Yes                                                                      | 68 (15%)                   | 30/141 (21%)                 | 18/162 (11%)                    | 20/148 (14%)              |                   |
| Prefer Not to Answer                                                     | 136 (30%)                  | 36/141 (26%)                 | 47/162 (29%)                    | 53/148 (36%)              |                   |
| No                                                                       | 247 (55%)                  | 75/141 (53%)                 | 97/162 (60%)                    | 75/148 (51%)              |                   |
| <b>High self-perceived risk of HIV (n=449)</b>                           | 34 (8%)                    | 5 (4%)                       | 1 (1%)                          | 28 (19%)                  | <b>&lt;0.0001</b> |
| <b>Modified voice score</b>                                              |                            |                              |                                 |                           | <b>0.0002</b>     |
| Median (IQR)                                                             | 7 (5, 7)                   | 7 (6, 7)                     | 7 (6, 7)                        | 6 (5, 7)                  |                   |

IQR: interquartile range

**Supplementary figure 1. Prevalence of curable STIs, by visit**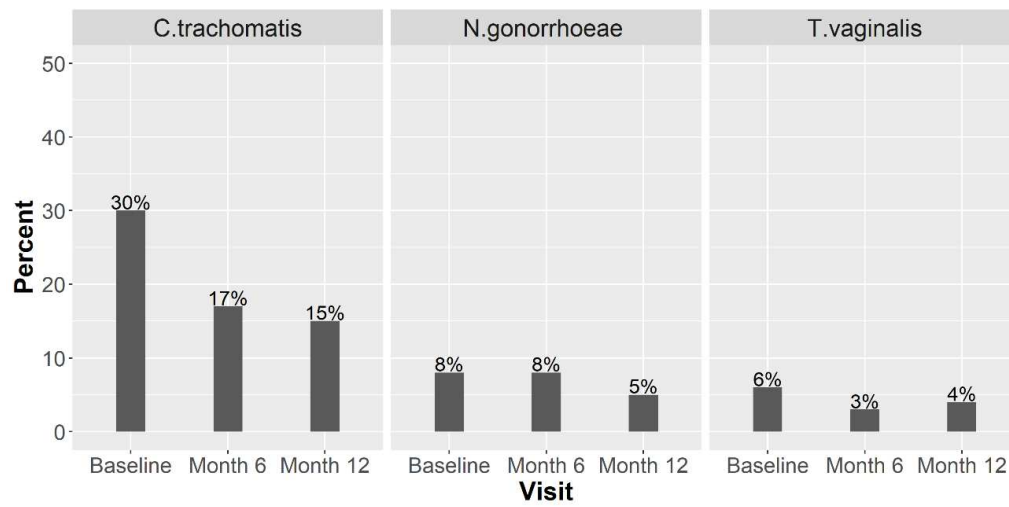

Supplement: sextrans-2022-055696supp001.pdf [file sextrans-2022-055696supp001.pdf]
